# Supplementary material for: Effects of Different Rotation Combinations of Cabbage, Kidney Bean and Maize on Soil Fungal Communities and Soil Nutrients
Source: MDPI journal article supplement (doi:10.3390/agronomy13071883), 2023-07-17
Supplement: s1 [file s1]

### 3.2

**Table S1.**Original data of soil fungal sequencing under different treatments.

| Treatment | Effective Reads | AvgLen/bp | Feature OTUs | Coverage/% |
|-----------|-----------------|-----------|--------------|------------|
| CMC       | 238,275         | 247       | 1,185        | 99.10      |
| BMC       | 237,485         | 247       | 1,157        | 99.00      |
| CCC       | 229,166         | 248       | 1,027        | 99.15      |
| CMB       | 158,244         | 246       | 1,181        | 99.00      |
| BMB       | 234,653         | 243       | 1,006        | 98.83      |
| BBB       | 221,833         | 244       | 1,182        | 99.01      |
| CCM       | 151,917         | 247       | 1,228        | 98.88      |
| CBM       | 204,660         | 245       | 1,163        | 99.02      |
| BBM       | 167,116         | 245       | 1,191        | 99.15      |
| BCM       | 157,670         | 244       | 1,122        | 98.99      |

### 3.3

**Table S2.** Soil fungal specific OTU under different treatments.

| Treatment | Feature OTU                                                                                                                                                                                                                           |
|-----------|---------------------------------------------------------------------------------------------------------------------------------------------------------------------------------------------------------------------------------------|
| CMC       | OTU885 Unclassified<br>OTU1337 Ascomycota, Eurotiomycetes, Eurotiales, Elaphomycetaceae, <i>Elaphomyces_leucosporus</i><br>OTU1462 Basidiomycota, Agaricomycetes, Trechisporales, Hydnodontaceae, Trechispora, Trechispora_microspora |
| BMC       | OTU1075 Basidiomycota, Unclassified<br>OTU574 Ascomycota, Unclassified<br>OTU1094 Ascomycota, Eurotiomycetes, Eurotiales, Aspergillaceae, <i>Penicillium</i> , Unclassified                                                           |
| CCC       | OTU4139 Mortierellomycota, Mortierella, <i>Mortierella_calciophila</i><br>OTU822 Ascomycota, Dothideomycetes, Pleosporales, Leptosphaeriaceae, <i>Leptosphaeria</i> , <i>Leptosphaeria_maculans</i>                                   |
| CMB       | OTU1987 Unclassified<br>OTU996 Basidiomycota, Unclassified                                                                                                                                                                            |
| BMB       | OTU986 Mortierellomycota, <i>Mortierella</i> , Unclassified                                                                                                                                                                           |
| BBB       | OTU620 Ascomycota, Sordariomycetes, Sordariales, Unclassified                                                                                                                                                                         |
| CCM       | No                                                                                                                                                                                                                                    |
| CBM       | OTU1113 Unclassified<br>OTU1419 Unclassified<br>OTU922 Basidiomycota, Unclassified                                                                                                                                                    |
| BBM       | OTU819 Unclassified<br>OTU851 Ascomycota, Dothideomycetes, Pleosporales, Didymosphaeriaceae, <i>Kalmusia</i> , <i>Kalmusia_longispora</i>                                                                                             |
| BCM       | OTU1004 Unclassified                                                                                                                                                                                                                  |
